# Supplementary material for: The combination of the entomopathogenic fungus Metarhizium anisopliae with the insecticide Imidacloprid increases virulence against the dengue vector Aedes aegypti (Diptera: Culicidae)
Source: Springer Nature journal article supplement (doi:10.1186/1756-3305-4-8), 2011-01-25

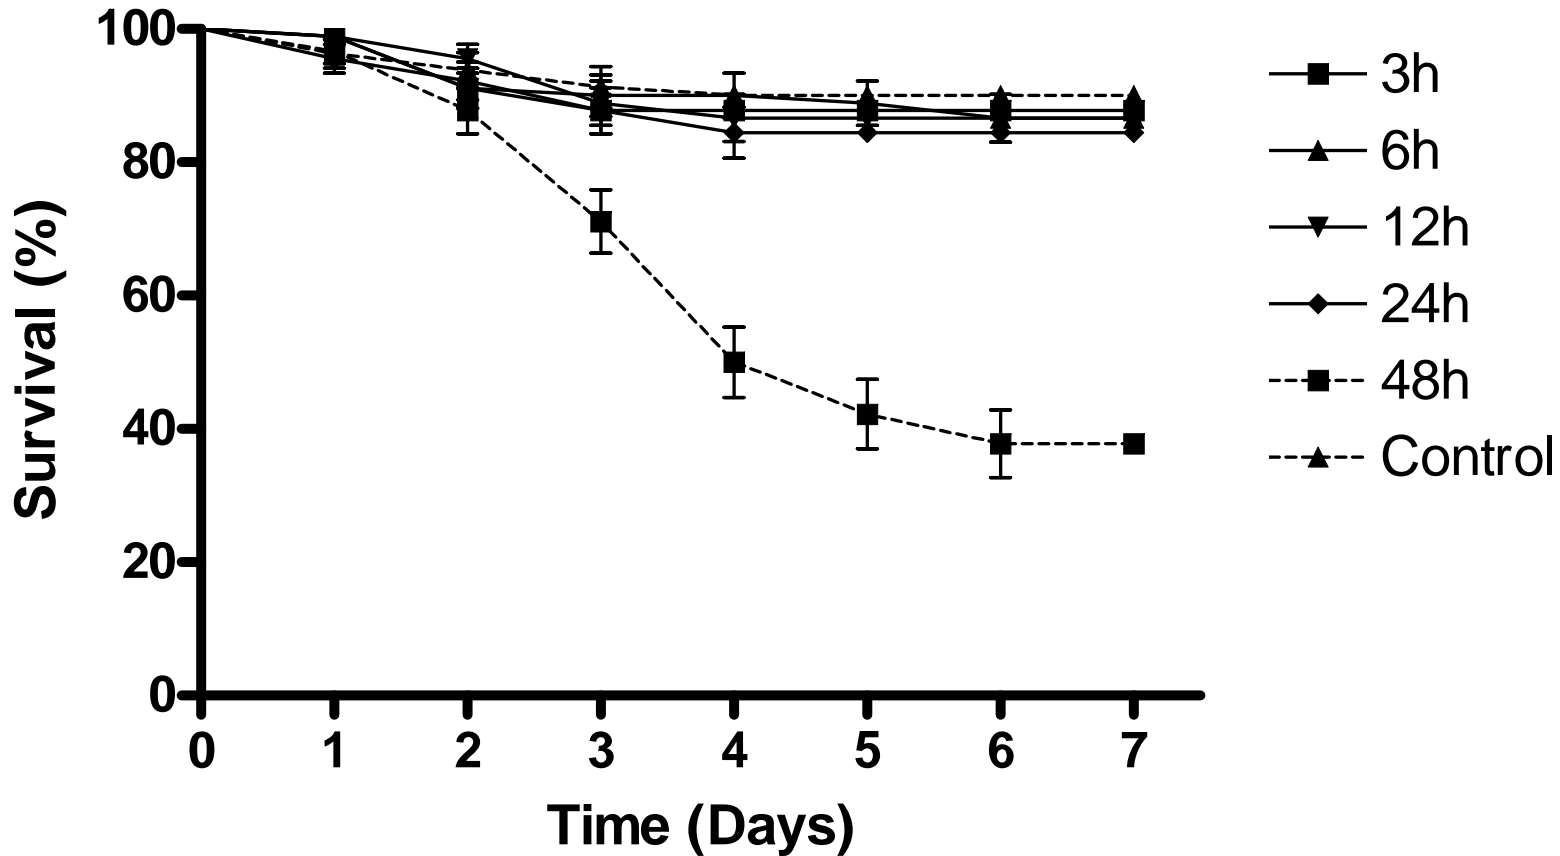

Supplement: 13071_2010_257_MOESM3_ESM.pdf [file 13071_2010_257_MOESM3_ESM.pdf]
