# Supplementary material for: The combination of the entomopathogenic fungus Metarhizium anisopliae with the insecticide Imidacloprid increases virulence against the dengue vector Aedes aegypti (Diptera: Culicidae)
Source: Springer Nature journal article supplement (doi:10.1186/1756-3305-4-8), 2011-01-25
Supplement: 13071_2010_257_MOESM4_ESM.pdf [file 13071_2010_257_MOESM4_ESM.pdf]

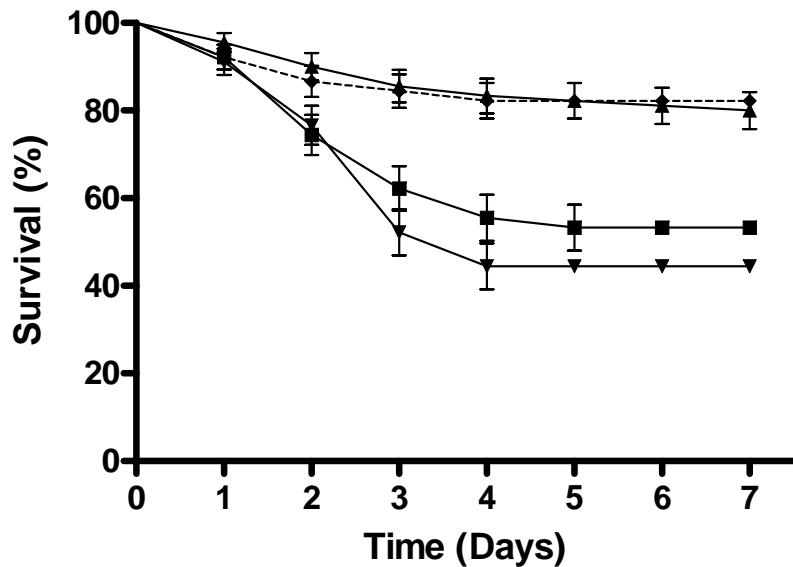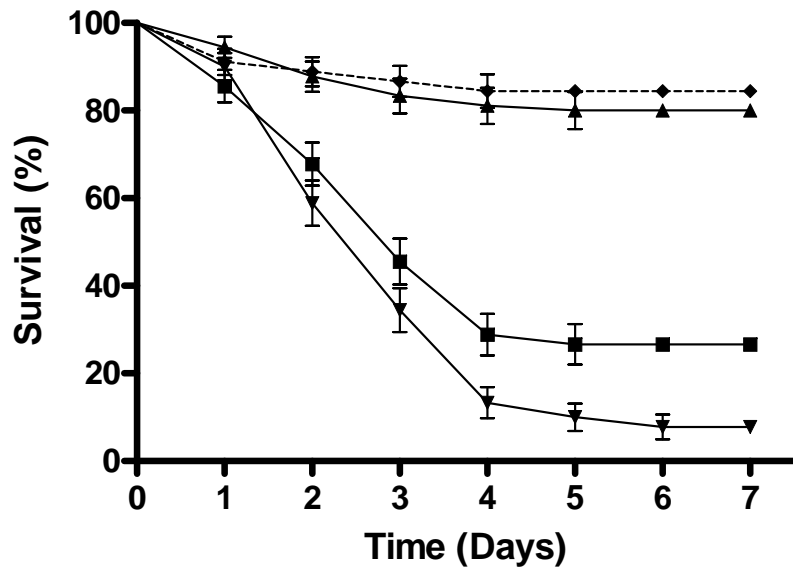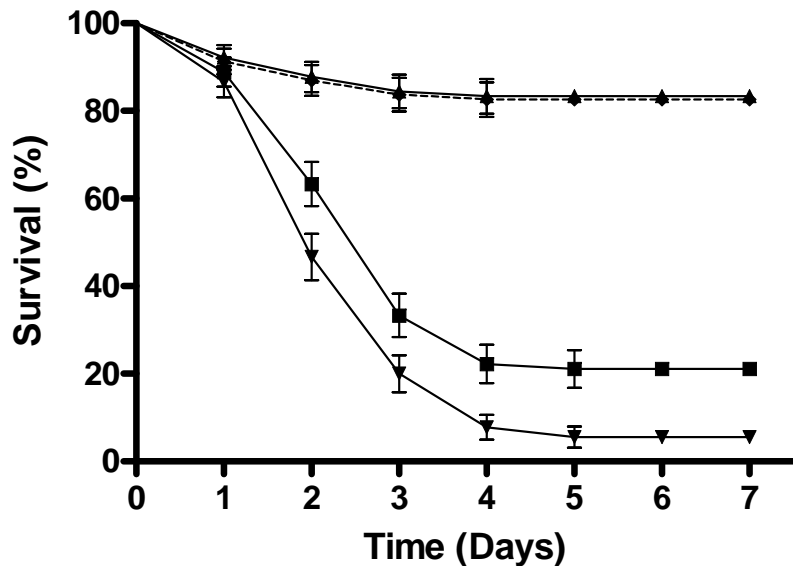

- LPP 133
- ▲ Control
- ▼ LPP 133 + IMI
- ◆ IMI
